# Supplementary material for: Protozoan‐Derived Cytokine‐Transgenic Macrophages Reverse Hepatic Fibrosis
Source: PubMed Central journal article supplement (PMC10987136; doi:10.1002/advs.202308750), 2024-01-21
Supplement: ADVS-11-2308750-s001.pdf [file ADVS-11-2308750-s001.pdf]

## Supporting Information

for *Adv. Sci.*, DOI 10.1002/adv.202308750

Protozoan-Derived Cytokine-Transgenic Macrophages Reverse Hepatic Fibrosis

*Ying Chen, Jie Wang, Nan Zhou, Qi Fang, Haijian Cai, Zhuoran Du, Ran An, Deng Liu, Xuepeng Chen, Xinxin Wang, Fangmin Li, Qi Yan, Lijian Chen\* and Jian Du\**

## Supporting Information for

### Protozoan-derived Cytokine-Transgenic Macrophages Reverse Hepatic Fibrosis

Ying Chen<sup>1, 2, 4, #</sup>, Jie Wang<sup>1, 2, #</sup>, Nan Zhou<sup>1, 2, #</sup>, Qi Fang<sup>3</sup>, Haijian Cai<sup>1, 2</sup>, Zhuoran Du<sup>6</sup>, Ran An<sup>1, 2</sup>, Deng Liu<sup>3</sup>, Xuepeng Chen<sup>5</sup>, Xinxin Wang<sup>5</sup>, Fangmin Li<sup>1, 2</sup>, Qi Yan<sup>1, 2</sup>, Lijian Chen<sup>3, \*</sup>, Jian Du<sup>1, 2, \*</sup>

<sup>1</sup> Department of Biochemistry and Molecular Biology, Research Center for Infectious Diseases, School of Basic Medical Sciences, Anhui Medical University, Hefei 230032, China

<sup>2</sup> The Provincial Key Laboratory of Zoonoses of High Institutions in Anhui, Anhui Medical University, Hefei 230032, China

<sup>3</sup> Department of Anesthesiology, The First Affiliated Hospital of Anhui Medical University, Hefei 230032, China

<sup>4</sup> School of Nursing, Anhui Medical University, Hefei 230032, China

<sup>5</sup> GMU-GIBH Joint School of Life Sciences, The Guangdong-Hong Kong-Macau Joint Laboratory for Cell Fate Regulation and Diseases, Guangzhou National Laboratory, Guangzhou Medical University, Guangzhou 510005, China

<sup>6</sup> Department of Clinical Medicine, Wannan Medical College, Wuhu 241002, China

<sup>#</sup>These authors contributed equally to this work.

Address for Correspondence:

\*To whom correspondence may be addressed. Email: [chenlijian77@126.com](mailto:chenlijian77@126.com), or [dujian@ahmu.edu.cn](mailto:dujian@ahmu.edu.cn)

#### This PDF file includes:

Table S1 for supplementary table

Fig S1 to S10 for multiple supplementary figures

**Table S1. Primers for qRT-PCR analysis (mouse).**

| Target        | Forward primer (5'-3')    | Reverse primer(5'-3')     |
|---------------|---------------------------|---------------------------|
| <i>Tg</i> MIF | ATGCCCAAGTGCATGATCTTTTG   | GCCGAAAGTTCGGTCGCC        |
| CCL-2         | CAGGTCCCTGTCATGCTTCT      | GTCAGCACAGACCTCTCTCT      |
| IL-1 $\beta$  | TCCAGGATGAGGACATGAGCAC    | GAACGTCACACACCAGCAGGTTA   |
| iNOS          | GCAGAGATTGGAGGCCTTGTG     | GGGTTGTTGCTGAACTTCCAGTC   |
| TIMP-1        | CGAGACCACCTTATAACCAGCG    | ATGACTGGGGTGTAGGCGTA      |
| MMP-9         | CCATGCACTGGGCTTAGATCA     | GGCCTTGGGTCAGGCTTAGA      |
| CX3CL-1       | ACGAAATGCGAAATCATGTGC     | CTGTGTCGTCTCCAGGACAA      |
| COL-1         | GCTCCTCTTAGGGGCACT        | ATTGGGGACCCTTAGGCCAT      |
| TGF- $\beta$  | GGATACCAACTATTGCTTCAGCTCC | AGGCTCCAAATATAGGGGCAGGGTC |
| $\alpha$ -SMA | CCCAGACATCAGGGAGTAATGG    | TCTATCGGATACTTCAGCGTCA    |

**Figure S1**

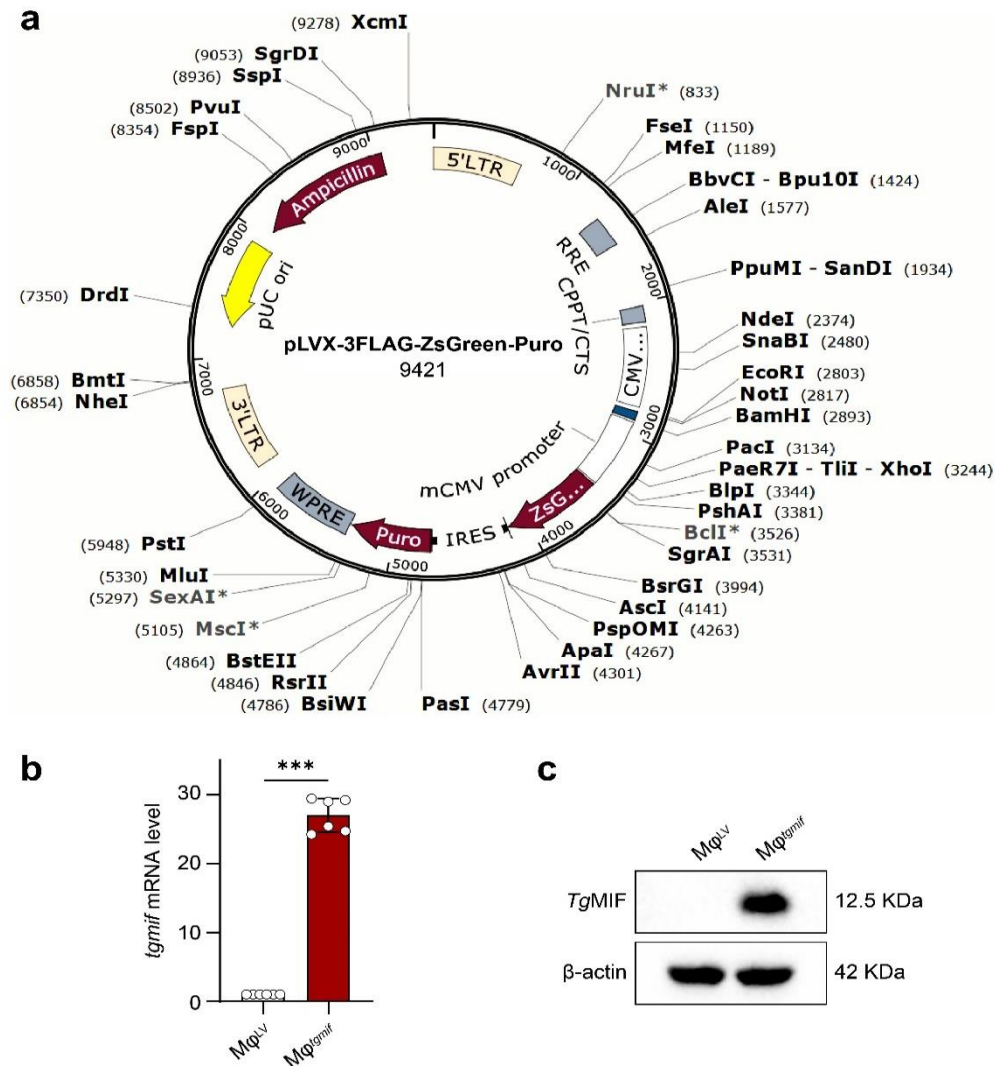

**Figure. S1. The expression of *TgMIF* in stable cell lines.**

**a.** Map of the pLVX-3FLAG-ZsGreen-Puro vector. **b.** The expression of *tgmif* gene in two stable cell lines Mφ<sup>tgmif</sup> and Mφ<sup>LV</sup> were examined through qRT-PCR (n=6 per group). Results were analyzed using a two-tailed t test. Bars=mean±SD. \*\*\*P < 0.001. **c.** The expression level of *TgMIF* protein in stable cell lines were examined by Western blot (WB) analysis.

**Figure S2**

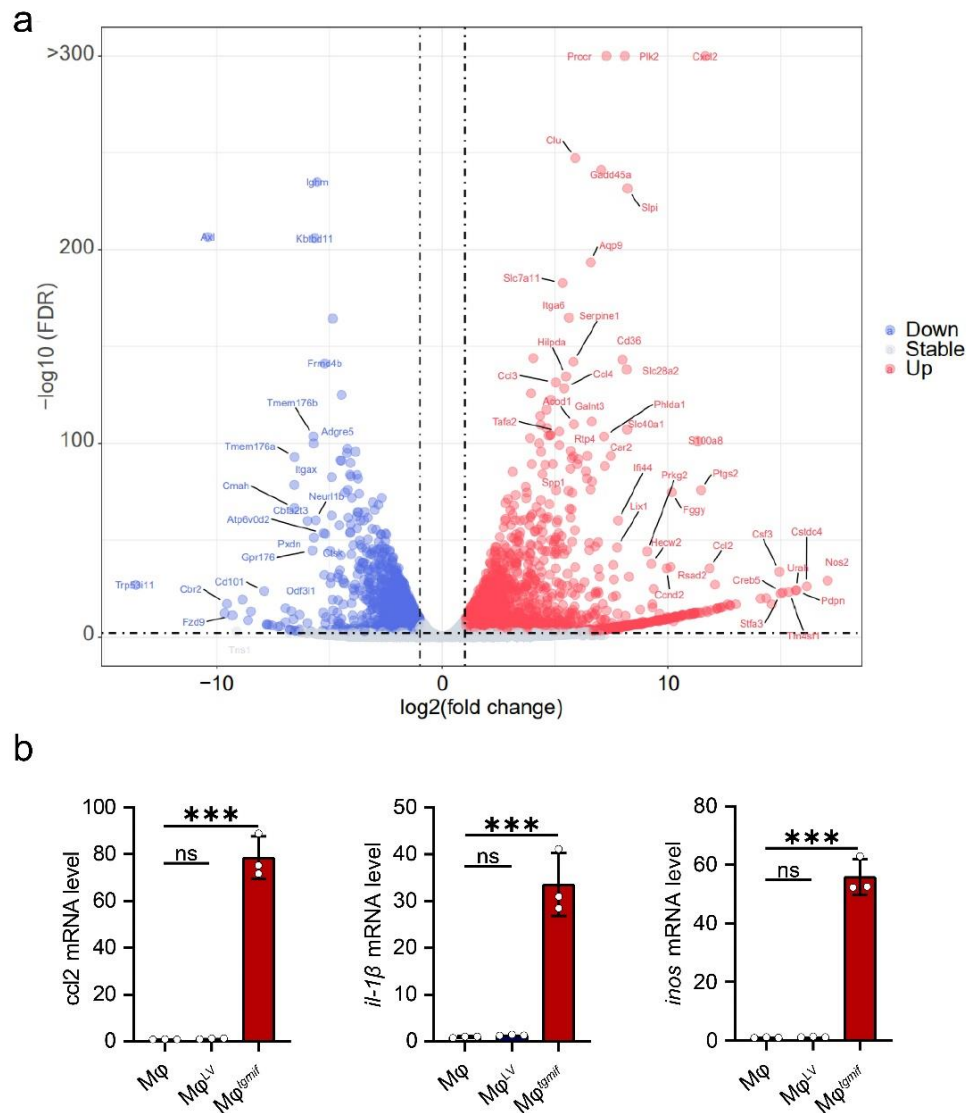

**Figure. S2. Volcano plot of gene expression profiles in  $M\phi^{tg^{mif}}$  and  $M\phi^{LV}$  samples.**  
**a.** Volcano plot showed the differentially expressed genes between  $M\phi^{tg^{mif}}$  and  $M\phi^{LV}$ , with  $FDR < 0.001$  and absolute log fold change (FC)  $> 1$ ; the red dots represent upregulated genes, the blue dots represent downregulated genes, and the gray dots represent genes with similar expression levels between the groups. **b.** The RNA-seq data was verified using qPCR. Quantification was shown (n=3 per group). The results were analyzed using one-way ANOVA. Bars = mean  $\pm$  SD. \*\*\*P < 0.001.

**Figure S3**

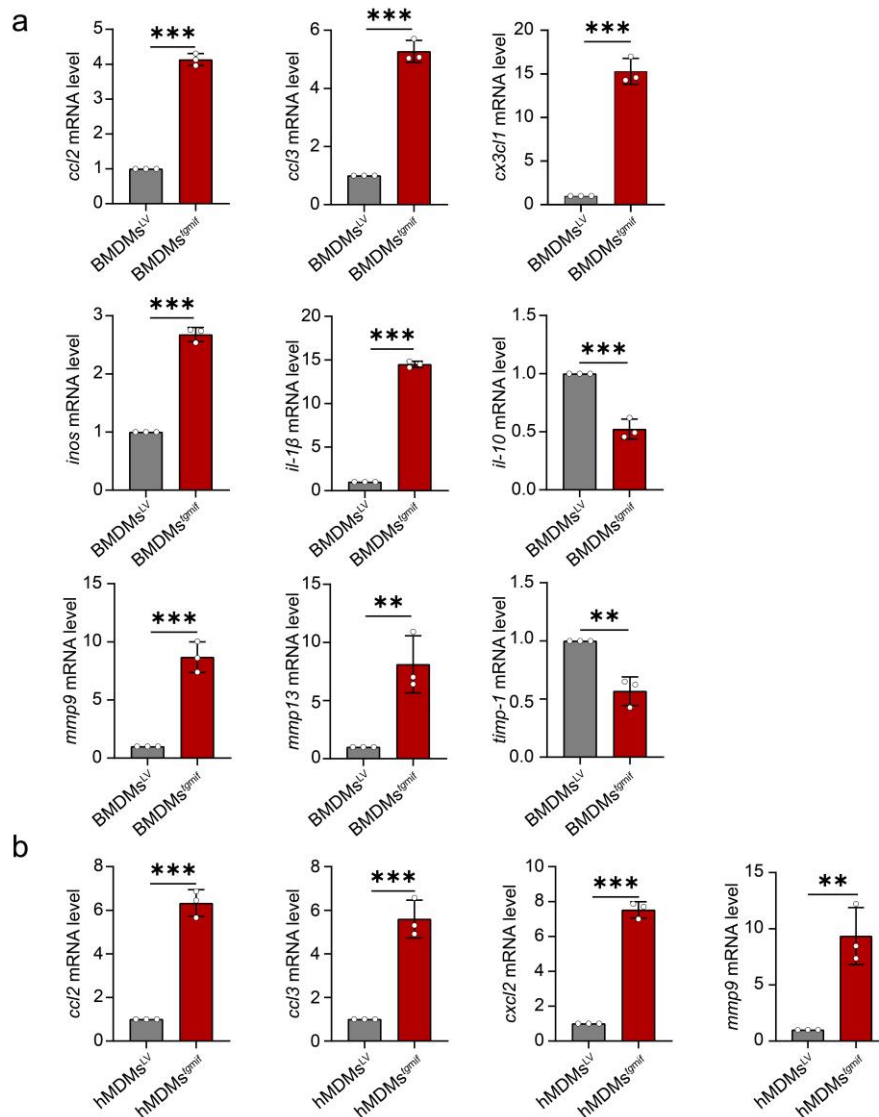

**Figure. S3. Verify the key screened results on BMDMs and hMDMs.**

**a.** Bone marrow-derived macrophages (BMDMs) were extracted and subjected to lentiviral transduction for overexpression of *TgMIF*. BMDMs<sup>TgMIF</sup>: BMDMs expressing LV-*TgMIF*-ZsGreen; BMDMs<sup>LV</sup>: BMDMs expressing LV-ZsGreen. Gene expressions were determined by qRT-PCR (n=3 per group). **b.** Human monocyte-derived macrophages (hMDMs) were extracted and subjected to lentiviral transduction for overexpression of *TgMIF*. hMDMs<sup>TgMIF</sup>: hMDMs expressing LV-*TgMIF*-ZsGreen; hMDMs<sup>LV</sup>: hMDMs expressing LV-ZsGreen. Gene expressions were determined by qRT-PCR (n=3 per group). The results were analyzed using a two-tailed Student's t test. Bars = mean ± SD. \*\*P < 0.005, \*\*\*P < 0.001.

**Figure S4**

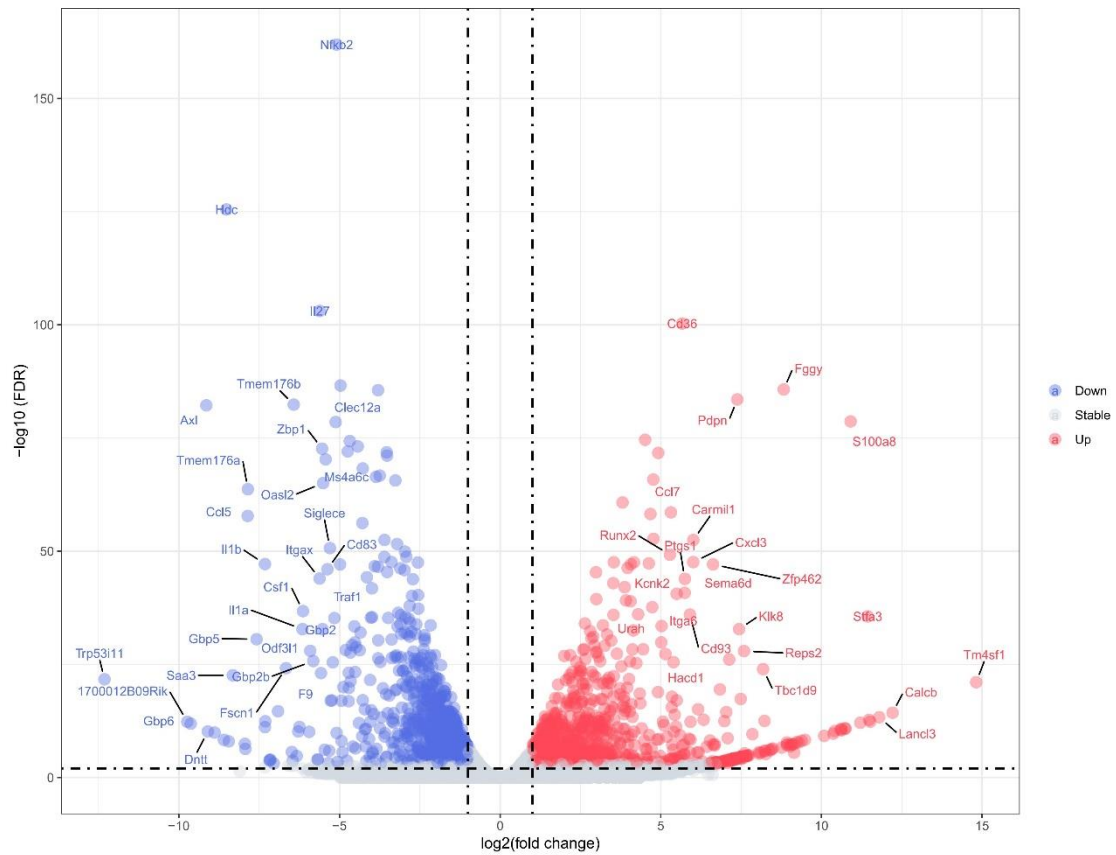

**Figure. S4. Volcano plot of the gene expression profile in  $M\phi^{tgmiif}$  and LPS/IFN- $\gamma$ - $M\phi$  samples.**

Volcano plot showing the differentially expressed genes between  $M\phi^{tgmiif}$  and LPS/IFN- $\gamma$ - $M\phi$ , with  $\text{FDR} < 0.001$  and absolute  $\log$  fold change (FC)  $> 1$ ; the red dots represent upregulated genes, the blue dots represent downregulated genes, and the gray dots represent genes with similar expression levels between the groups.

**Figure S5**

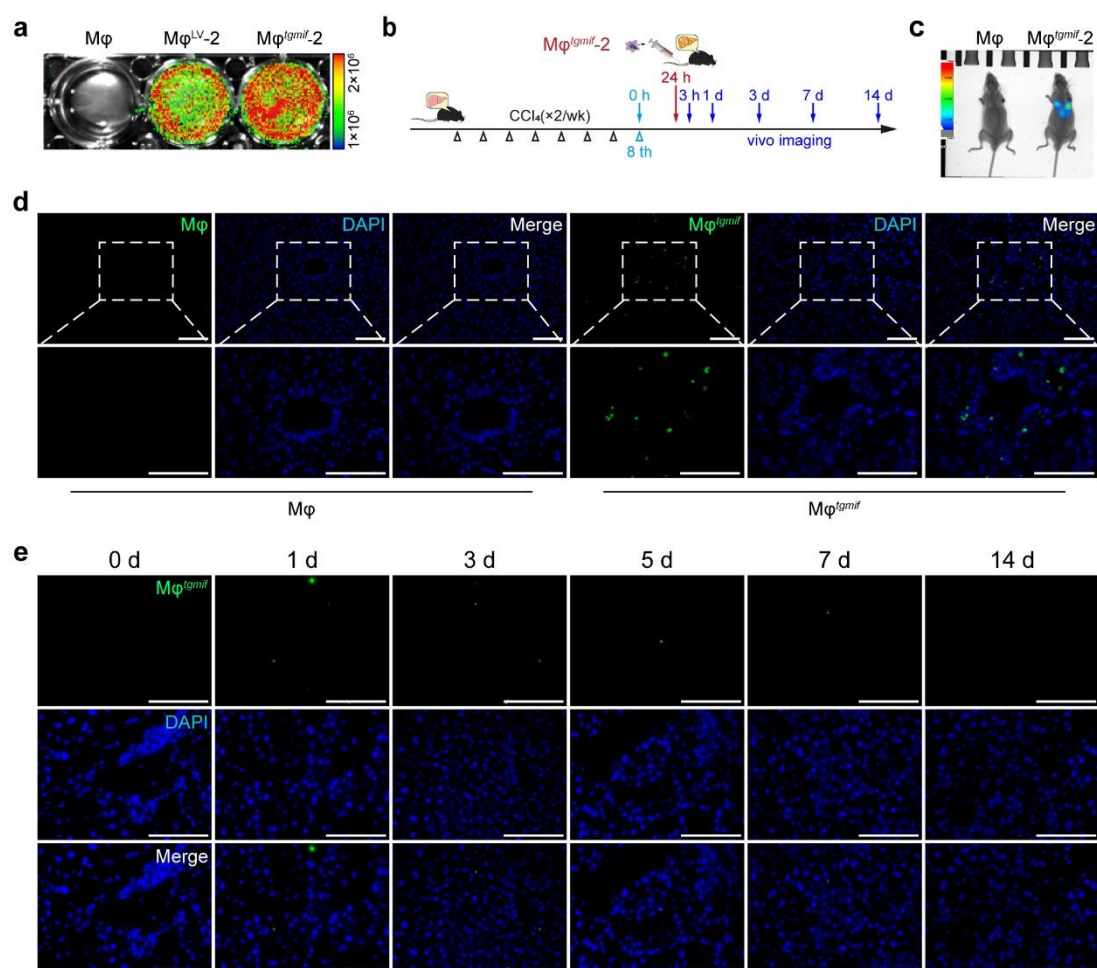

**Figure. S5. Infused macrophages engraft in liver tissues.**

**a.** Bioluminescence showed that Antares2-expressing macrophages had strong bioluminescence signals *in vitro*. **b.** Study design: Mice were infused with macrophages ( $2 \times 10^6$ /mouse) one day after the 8th CCl<sub>4</sub> injection through the tail vein and examined at 3 h, 1 d, 3 d, 7 d and 14 d. **c.** Whole-body imaging using IVIS at 10 min after infusion. Mφ: RAW264.7; Mφ<sup>LV-2</sup>: Mφ stable expression of LV-Antares2; Mφ<sup>tgMif-2</sup>: Mφ stable expression of LV-TgMIF-Antares2. **d.** To further confirm that macrophages indeed reached the liver, we infused CCl<sub>4</sub>-induced fibrotic mice with ZsGreen-labeled macrophages. Mice were sacrificed humanely 24 hours after injection. The liver tissues were collected, and frozen sections were prepared and visualized under a fluorescence microscope (above pictures display magnification:  $\times 200$ , below pictures display magnification:  $\times 400$ , Scale bar=100  $\mu$ m). **e.** Immunofluorescent staining of the fresh-frozen sections as indicated time points (Scale bar=100  $\mu$ m).



**Figure S6**

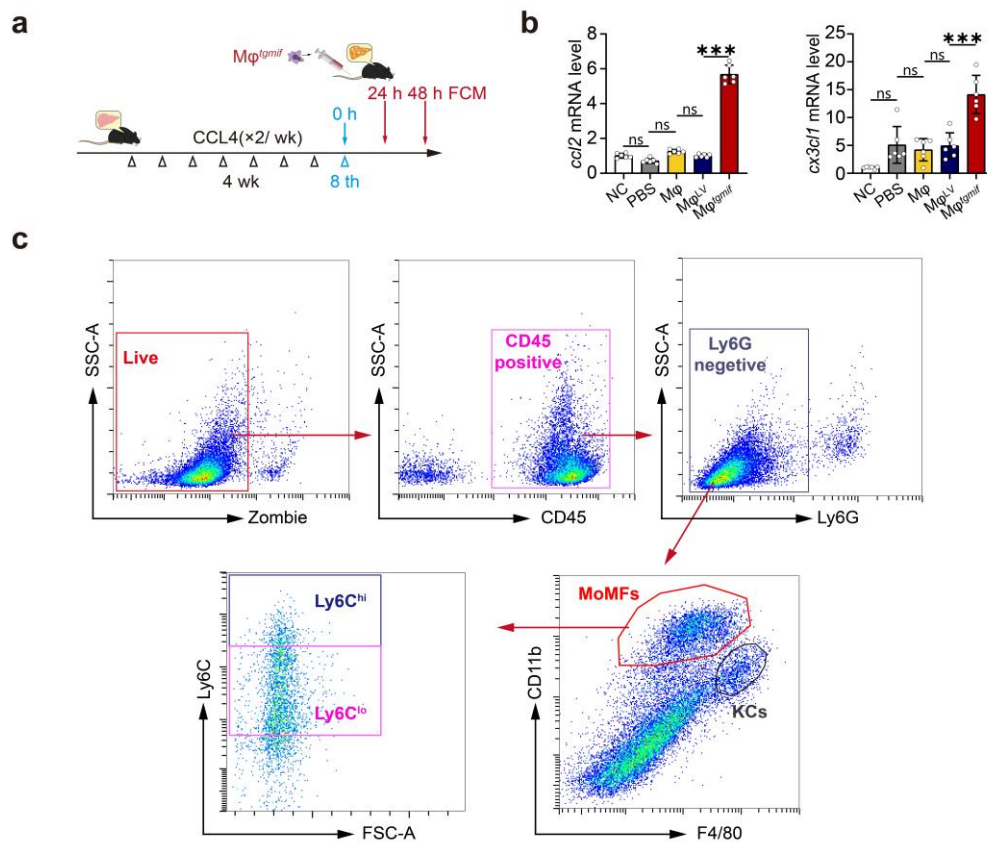

**Figure. S6. Characterization of MoMFs and KCs.**

**a.** Study design: Mice were infused with  $2 \times 10^6$  macrophages (diluted in 150  $\mu$ l PBS) or 150  $\mu$ l PBS through the tail vein at 24 h post-8th CCL<sub>4</sub> injection. Mice were euthanized 1 day after injection. **b.** The relative mRNA expression levels of *cx3cl1* and *ccl2* in liver tissue were determined by qRT-PCR (n=6 per group). **c.** Hepatic macrophages were isolated 24 hours after cell infusion and analyzed by flow cytometry. Cells were gated to identify MoMFs (CD45<sup>+</sup>Ly6G<sup>-</sup>CD11b<sup>hi</sup>F4/80<sup>int</sup>) and KCs (CD45<sup>+</sup>Ly6G<sup>-</sup>CD11b<sup>lo</sup>F4/80<sup>hi</sup>). These MoMFs were further divided into proinflammatory MoMFs (Ly6C<sup>hi</sup>) and restorative MoMFs (Ly6C<sup>lo</sup>).

**Figure S7**

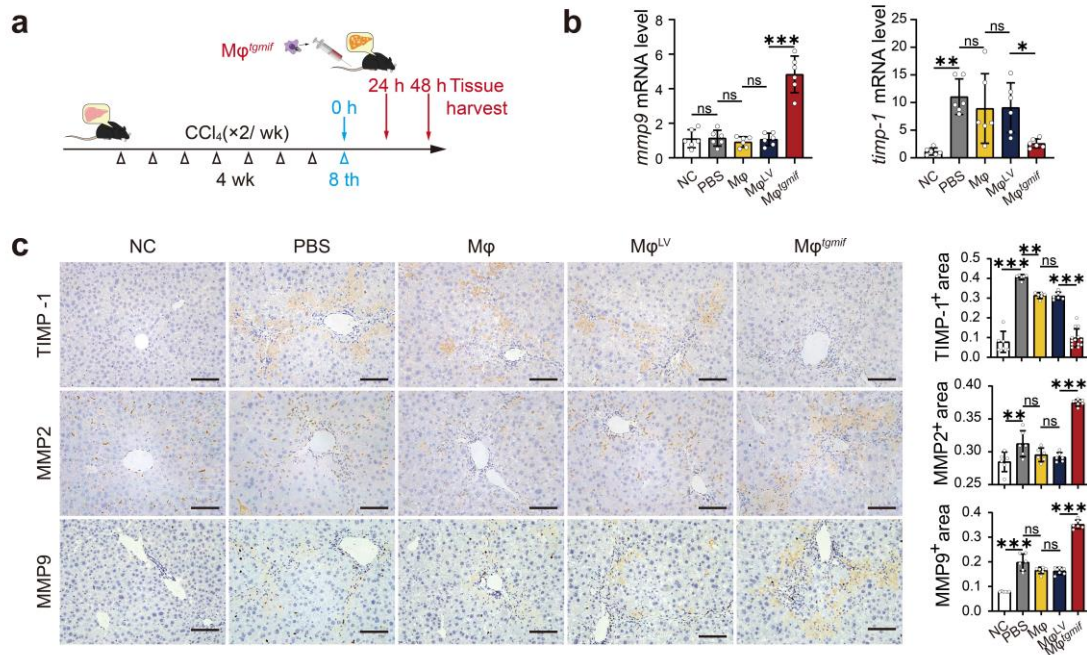

**Figure. S7. Mφ<sup>tg<sup>mif</sup></sup> regulates the MMP/TIMP ratio.**

**a.** Study design: Mice were infused with  $2 \times 10^6$  macrophages (diluted in 150  $\mu$ l PBS) or 150  $\mu$ l PBS through the tail vein at 24 h post-8th CCl<sub>4</sub> injection. Mice were euthanized 24 hours after inoculation. **b.** The relative mRNA expression levels of mmp9 and timp-1 in liver tissue were determined by qRT-PCR (n=6 per group). **c.** The expression of TIMP-1, MMP2 and MMP9 in livers tested by IHC ( $\times 200$ ; Scale bar=200  $\mu$ m). Positively stained regions were quantitatively analyzed on the right (n = 6/6/6/6/13 (TIMP-1) per group; n=6 per group (mmp2 and mmp 9)). Results were analyzed using one-way ANOVA. Bars = mean  $\pm$  SD. \*P < 0.05, \*\*P < 0.01, \*\*\*P < 0.001 and ns, not statistically significant. NC: negative control, mice were treated with an equal amount of pure olive oil; PBS: fibrotic mice received PBS; Mφ: fibrotic mice received RAW264.7; Mφ<sup>LV</sup>: fibrotic mice received Mφ<sup>LV</sup> stable cell line; Mφ<sup>tg<sup>mif</sup></sup>: fibrotic mice received Mφ<sup>tg<sup>mif</sup></sup> stable cell line.

**Figure S8**

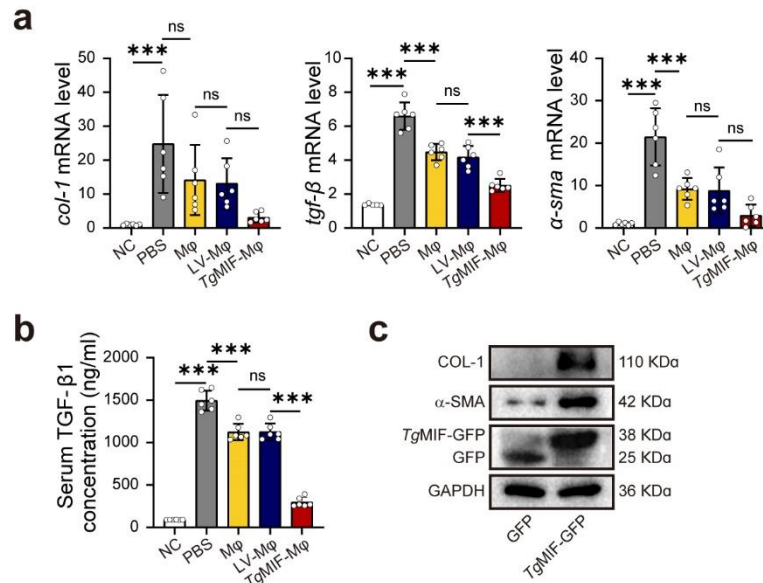

**Figure. S8. Mφ<sup>tgMIF</sup> but not TgMIF deactivates HSCs.**

**a.** The relative mRNA expression levels of col-1, tgf-β, and α-SMA in liver tissue were determined by qRT-PCR (n=6 per group). **b.** ELISA was used to detect the release levels of TGF-β1 in the serum of mice (n=6 per group). The results were analyzed using one-way ANOVA. Bars = mean ± SD. \*\*\*P < 0.001 and ns, not statistically significant. NC: negative control, mice were treated with an equal amount of pure olive oil; PBS: fibrotic mice receive PBS; Mφ: fibrotic mice received RAW264.7; Mφ<sup>LV</sup>: fibrotic mice received Mφ<sup>LV</sup> stable cell line; Mφ<sup>tgMIF</sup>: fibrotic mice received Mφ<sup>tgMIF</sup> stable cell line. **c.** Protein expression in LX-2 cells transfected with TgMIF-GFP or GFP (control) was detected by WB.

**Figure S9**

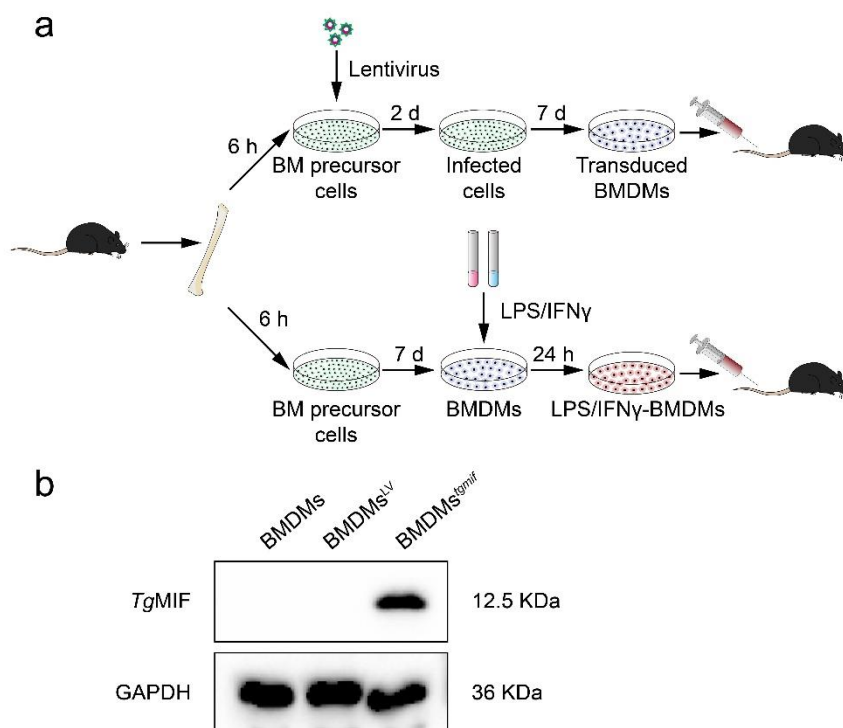

**Figure. S9. The expression of *TgMIF* in BMDMs<sup>gmif</sup>.**

**a.** BMDMs lentiviral transduction and LPS/IFN- $\gamma$ -BMDMs construction. **b.** The expression of *TgMIF* in different groups of BMDMs. GAPDH was detected as the loading control.



**Figure S10**

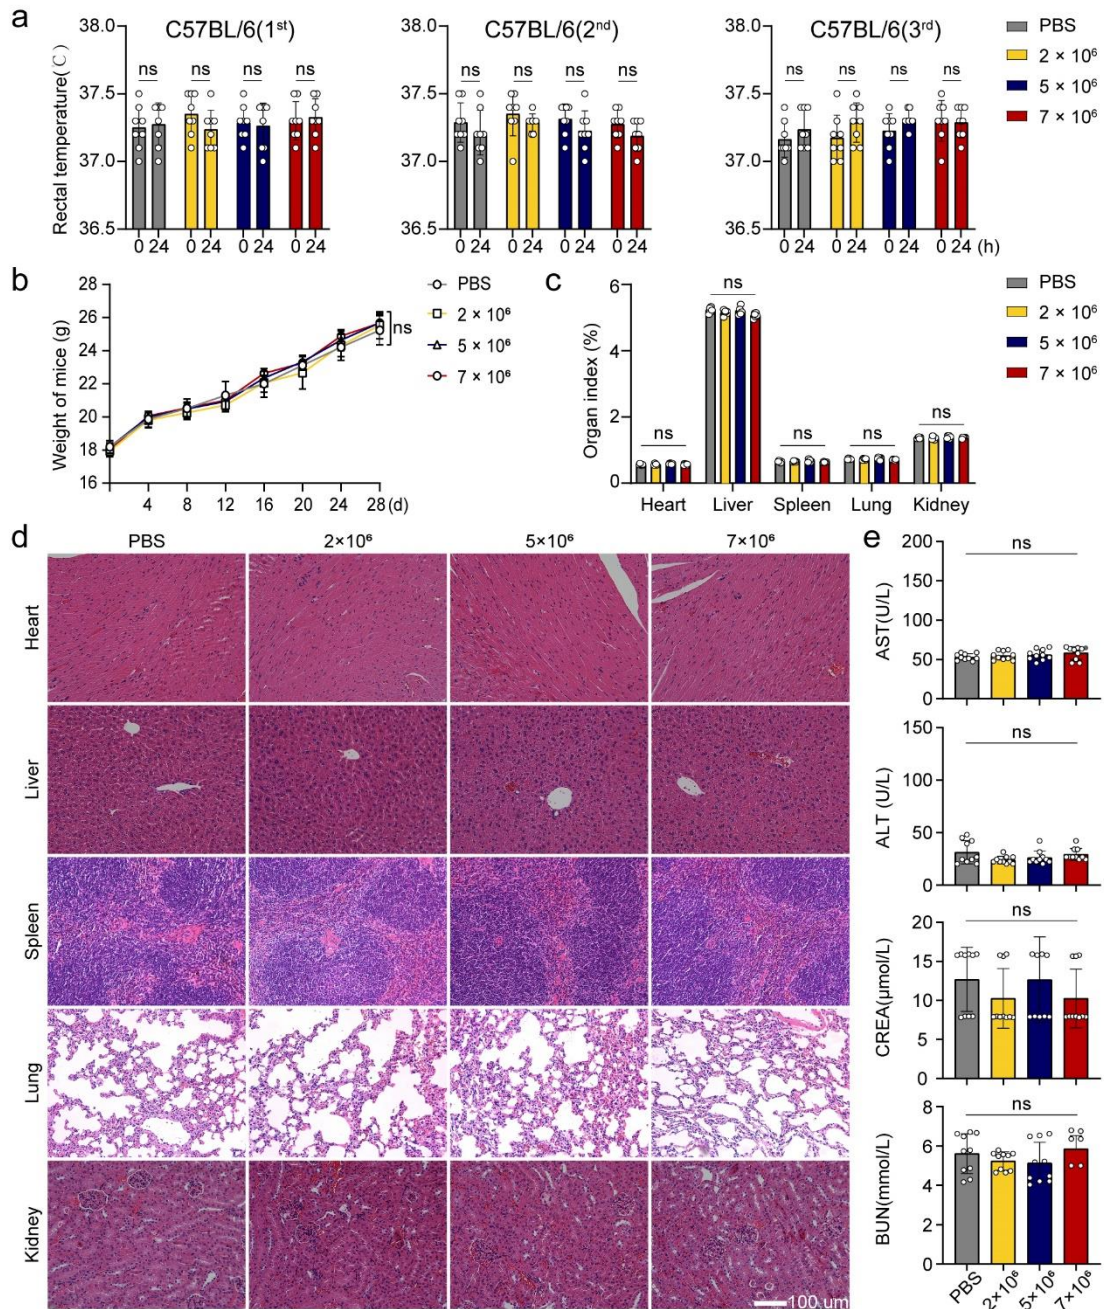

**Figure. S10. Assess the systemic safety and toxicity of BMDMs<sup>tg<sup>mif</sup></sup>.**

**a.** C57BL/6 mice were given three dosages of BMDMs ( $2 \times 10^6$ ,  $5 \times 10^6$ , and  $7 \times 10^6$  diluted in 150  $\mu$ l PBS, respectively) or 150  $\mu$ l PBS via the tail vein weekly for three weeks, and rectal temperature was monitored immediately before and 24 hours after each injection (n=8 per group). **b.** C57BL/6 mice were administered three dosages of BMDMs<sup>tg<sup>mif</sup></sup> weekly for three weeks. Body weight of the mice was monitored prior to injection and every 4 days until 4 weeks (n=6 per group). **c-e.** C57BL/6 mice were administered three dosages of BMDMs<sup>tg<sup>mif</sup></sup> weekly for three weeks. After the third injection, the mice were

sacrificed humanely one week later and the organ index (n=6 per group) **(c)**, the damage status of the major organs **(d)** as well as liver and kidney function (n=10 per group) **(e)**, were evaluated. The results were analyzed using one-way ANOVA. Bars = mean  $\pm$  SD. ns, not statistically significant.
